# Supplementary material for: Short-term wind power forecasting through stacked and bi directional LSTM techniques
Source: PeerJ journal article supplement (doi:10.7717/peerj-cs.1949), 2024-03-29

### Wind Farm 1 - Bidirectional LSTM

| Epochs  | Training Loss | Validation Loss | MSE Training loss | MSE Validation Loss |
|---------|---------------|-----------------|-------------------|---------------------|
| epoch 1 | 0.0067        | 0.0042          | 0.0136            | 0.0085              |
| epoch 2 | 0.0041        | 0.0037          | 0.0083            | 0.0075              |
| epoch 3 | 0.0037        | 0.0036          | 0.0074            | 0.0072              |
| epoch 4 | 0.0034        | 0.0046          | 0.0068            | 0.0093              |
| epoch 5 | 0.0033        | 0.0042          | 0.0066            | 0.0085              |

### Wind Farm 1 - Stacked LSTM

| Epochs  | Training Loss | Validation Loss | MSE Training loss | MSE Validation Loss |
|---------|---------------|-----------------|-------------------|---------------------|
| epoch 1 | 0.0072        | 0.0048          | 0.0145            | 0.0098              |
| epoch 2 | 0.0037        | 0.0039          | 0.0075            | 0.0079              |
| epoch 3 | 0.0032        | 0.0037          | 0.0064            | 0.0074              |
| epoch 4 | 0.0029        | 0.0036          | 0.0059            | 0.0072              |
| epoch 5 | 0.0028        | 0.0035          | 0.0056            | 0.007               |

### Wind Farm 2 - Bidirectional LSTM

| Epochs  | Training Loss | Validation Loss | MSE Training loss | MSE Validation Loss |
|---------|---------------|-----------------|-------------------|---------------------|
| epoch 1 | 0.0075        | 0.0059          | 0.0151            | 0.0119              |
| epoch 2 | 0.0044        | 0.0057          | 0.0089            | 0.0117              |
| epoch 3 | 0.0039        | 0.0069          | 0.0079            | 0.014               |
| epoch 4 | 0.0037        | 0.0054          | 0.0075            | 0.0111              |
| epoch 5 | 0.0035        | 0.0047          | 0.0071            | 0.0096              |

### Wind Farm 2 - Stacked LSTM

| Epochs  | Training Loss | Validation Loss | MSE Training loss | MSE Validation Loss |
|---------|---------------|-----------------|-------------------|---------------------|
| epoch 1 | 0.0084        | 0.006           | 0.017             | 0.0123              |
| epoch 2 | 0.0038        | 0.0055          | 0.0077            | 0.0113              |
| epoch 3 | 0.0034        | 0.0057          | 0.0069            | 0.0117              |
| epoch 4 | 0.0032        | 0.0046          | 0.0064            | 0.0095              |
| epoch 5 | 0.003         | 0.0046          | 0.0061            | 0.0094              |

### Wind Farm 3 - Bidirectional LSTM

| Epochs  | Training Loss | Validation Loss | MSE Training loss | MSE Validation Loss |
|---------|---------------|-----------------|-------------------|---------------------|
| epoch 1 | 0.0109        | 0.0146          | 0.0223            | 0.0297              |
| epoch 2 | 0.0069        | 0.0066          | 0.014             | 0.0135              |
| epoch 3 | 0.0062        | 0.0067          | 0.0126            | 0.0137              |
| epoch 4 | 0.006         | 0.0072          | 0.0121            | 0.0146              |
| epoch 5 | 0.0059        | 0.0065          | 0.012             | 0.0134              |

### Wind Farm 3 - Stacked LSTM

| Epochs  | Training Loss | Validation Loss | MSE Training loss | MSE Validation Loss |
|---------|---------------|-----------------|-------------------|---------------------|
| epoch 1 | 0.0111        | 0.0087          | 0.0227            | 0.0178              |
| epoch 2 | 0.0059        | 0.007           | 0.0119            | 0.0144              |
| epoch 3 | 0.0053        | 0.0063          | 0.0107            | 0.013               |
| epoch 4 | 0.005         | 0.006           | 0.0101            | 0.0124              |
| epoch 5 | 0.0049        | 0.006           | 0.0099            | 0.0124              |

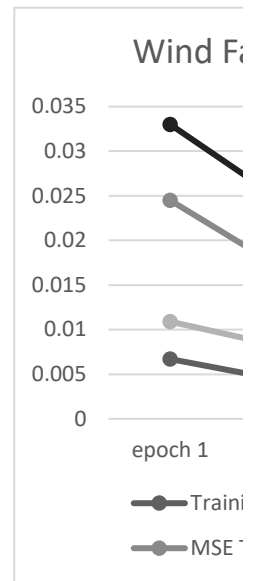

#### Wind Farm 4 - Bidirectional LSTM

| Epochs  | Training Loss | Validation Loss | MSE Training loss | MSE Validation Loss |
|---------|---------------|-----------------|-------------------|---------------------|
| epoch 1 | 0.0104        | 0.0063          | 0.0211            | 0.0129              |
| epoch 2 | 0.0064        | 0.0054          | 0.013             | 0.0111              |
| epoch 3 | 0.0055        | 0.0067          | 0.0111            | 0.0136              |
| epoch 4 | 0.0052        | 0.0052          | 0.0105            | 0.0107              |
| epoch 5 | 0.005         | 0.005           | 0.01              | 0.0102              |

#### Wind Farm 4 - Stacked LSTM

| Epochs  | Training Loss | Validation Loss | MSE Training loss | MSE Validation Loss |
|---------|---------------|-----------------|-------------------|---------------------|
| epoch 1 | 0.0103        | 0.0073          | 0.0209            | 0.0149              |
| epoch 2 | 0.0053        | 0.0055          | 0.0106            | 0.0112              |
| epoch 3 | 0.0046        | 0.0051          | 0.0094            | 0.0104              |
| epoch 4 | 0.0043        | 0.0058          | 0.0088            | 0.0117              |
| epoch 5 | 0.0042        | 0.0054          | 0.0084            | 0.011               |

#### Wind Farm 5 - Bidirectional LSTM

| Epochs  | Training Loss | Validation Loss | MSE Training loss | MSE Validation Loss |
|---------|---------------|-----------------|-------------------|---------------------|
| epoch 1 | 0.0097        | 0.0083          | 0.0197            | 0.0171              |
| epoch 2 | 0.0061        | 0.0076          | 0.0123            | 0.0157              |
| epoch 3 | 0.0055        | 0.0127          | 0.0112            | 0.026               |
| epoch 4 | 0.0052        | 0.0066          | 0.0106            | 0.0136              |
| epoch 5 | 0.005         | 0.0066          | 0.0101            | 0.0136              |

#### Wind Farm 5 - Stacked LSTM

| Epochs  | Training Loss | Validation Loss | MSE Training loss | MSE Validation Loss |
|---------|---------------|-----------------|-------------------|---------------------|
| epoch 1 | 0.0101        | 0.0087          | 0.0207            | 0.0178              |
| epoch 2 | 0.0055        | 0.01            | 0.0111            | 0.0204              |
| epoch 3 | 0.0048        | 0.0072          | 0.0098            | 0.0149              |
| epoch 4 | 0.0045        | 0.007           | 0.0091            | 0.0144              |
| epoch 5 | 0.0044        | 0.0073          | 0.0088            | 0.0149              |

### arm 1 - Bidirectional LSTM

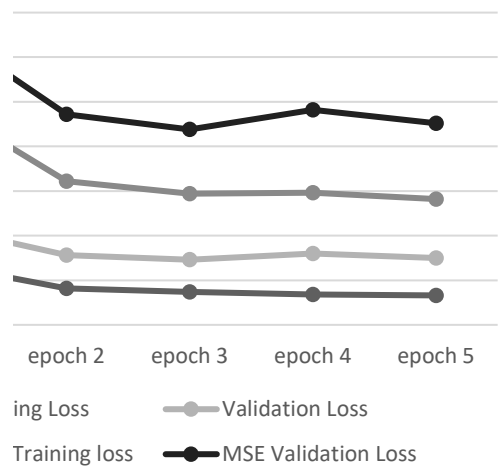

### Wind Farm 1 - Stacked LSTM

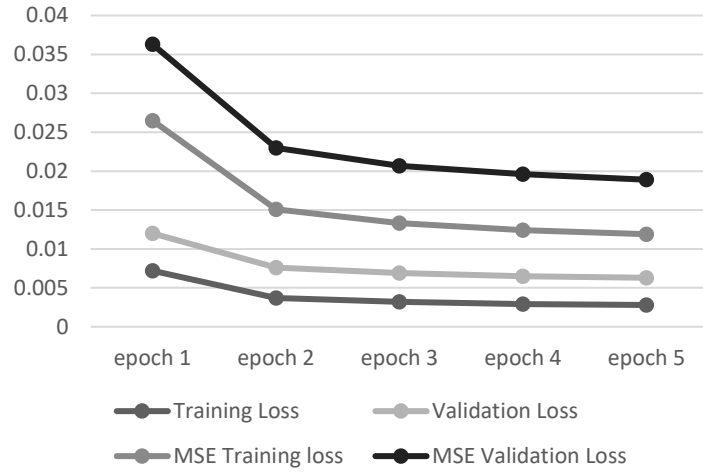

Supplement: loss_graph.pdf [file loss_graph.pdf]
